# Supplementary material for: DW-UNet: Loss Balance under Local-Patch for 3D Infection Segmentation from COVID-19 CT Images
Source: MDPI journal article supplement (doi:10.3390/diagnostics11111942), 2021-10-20
Supplement: s1 [file s1]

# Supporting information to: “DW-UNet: Loss Balance Under Local-Patch for 3D Infection Segmentation from COVID-19 CT Images”

Cheng Chen <sup>1,&</sup>, Jiancang Zhou <sup>2,&</sup>, Kangneng Zhou <sup>1</sup>, Zhiliang Wang <sup>1</sup> and Ruoxiu Xiao <sup>1,\*</sup>

<sup>1</sup> School of Computer and Communication Engineering, University of Science and Technology Beijing, Beijing 100083, China; xiaoruoxiu@ustb.edu.cn

<sup>2</sup> Department of critical care medicine, Sir Run Run Shaw hospital, Zhejiang University school of medicine, Hangzhou, 310016, China; jiancangzhou@zju.edu.cn

\* Correspondence: xiaoruoxiu@ustb.edu.cn; Tel.: +86-15210326132

& Cheng Chen and Jiancang Zhou contributed to this work equally.

This supporting information is used to supplement the main text. During the evaluation process, this work selected two datasets to test the proposed method. The CT images of 20 of the cases came from the Fifth Medical Center of the PLA General Hospital. The details of each subject are reported in Table S1. Another data set is selected from Kaggle's public COVID-19 data set, and its details are reported in Table S2.

**Table S1** Details of each subject in the private dataset

| Subject ID | Number of slices | Allocation   | Subject ID | Number of slices | Allocation   |
|------------|------------------|--------------|------------|------------------|--------------|
| Subject 01 | 529              | Training set | Subject 11 | 489              | Training set |
| Subject 02 | 529              | Training set | Subject 12 | 553              | Training set |
| Subject 03 | 569              | Training set | Subject 13 | 537              | Testing set  |
| Subject 04 | 553              | Training set | Subject 14 | 593              | Testing set  |
| Subject 05 | 521              | Training set | Subject 15 | 529              | Testing set  |
| Subject 06 | 513              | Training set | Subject 16 | 513              | Testing set  |
| Subject 07 | 553              | Training set | Subject 17 | 561              | Testing set  |
| Subject 08 | 529              | Training set | Subject 18 | 245              | Testing set  |
| Subject 09 | 513              | Training set | Subject 19 | 489              | Testing set  |
| Subject 10 | 473              | Training set | Subject 20 | 441              | Testing set  |

**Table S2** Details of each subject in the public dataset [1][2]

| Subject ID | Number of slices | Allocation  |
|------------|------------------|-------------|
| Subject 01 | 301              | Testing set |
| Subject 02 | 200              | Testing set |
| Subject 03 | 290              | Testing set |
| Subject 04 | 213              | Testing set |
| Subject 05 | 249              | Testing set |
| Subject 06 | 301              | Testing set |
| Subject 07 | 256              | Testing set |
| Subject 08 | 301              | Testing set |

This study analyzed the results of data augmentation and different models through statistical tests to ensure that there are significant differences between the different results. Regarding the McNemar test [3] used for data augmentation in the manuscript, the Var. 1 \* Var. 2 crosstabulation is shown in Table S3. Also, the Var. 1 \* Var. 2 crosstabulation for different models is presented in Table S4.

**Table S3** Var. 1 \* Var. 2 Crosstabulation for Data Augmentation

|       |                |                | Var.2       |              | Total        |
|-------|----------------|----------------|-------------|--------------|--------------|
|       |                |                | 0           | 1            |              |
| Var.1 | 0              | Count          | 656415613   | 368043131    | 1024458744   |
|       |                | Expected Count | 531485132.0 | 492973612.0  | 1024458744.0 |
|       |                | % within Var.1 | 64.1%       | 35.9%        | 100.0%       |
|       |                | % within Var.2 | 61.8%       | 37.3%        | 50.0%        |
|       | 1              | Count          | 406554651   | 617904093    | 1024458744   |
|       |                | Expected Count | 531485132.0 | 492973612.0  | 1024458744.0 |
|       |                | % within Var.1 | 39.7%       | 60.3%        | 100.0%       |
|       |                | % within Var.2 | 38.2%       | 62.7%        | 50.0%        |
| Total | Count          | 1062970264     | 985947224   | 2048917488   |              |
|       | Expected Count | 1062970264.0   | 985947224.0 | 2048917488.0 |              |
|       | % within Var.1 | 51.9%          | 48.1%       | 100.0%       |              |
|       | % within Var.2 | 100.0%         | 100.0%      | 100.0%       |              |

**Table S4** Var.1 \* Var.2 Crosstabulation for different models

|       |      |                | Var.2        |              | Total        |
|-------|------|----------------|--------------|--------------|--------------|
|       |      |                | .00          | 1.00         |              |
| Var.1 | .00  | Count          | 496501995    | 527956749    | 1024458744   |
|       |      | Expected Count | 490774556.4  | 533684187.6  | 1024458744.0 |
|       |      | % within Var.1 | 48.5%        | 51.5%        | 100.0%       |
|       |      | % within Var.2 | 20.2%        | 19.8%        | 20.0%        |
|       | 1.00 | Count          | 406554651    | 617904093    | 1024458744   |
|       |      | Expected Count | 490774556.4  | 533684187.6  | 1024458744.0 |
|       |      | % within Var.1 | 39.7%        | 60.3%        | 100.0%       |
|       |      | % within Var.2 | 16.6%        | 23.2%        | 20.0%        |
|       | 2.00 | Count          | 516096268    | 508362476    | 1024458744   |
|       |      | Expected Count | 490774556.4  | 533684187.6  | 1024458744.0 |
|       |      | % within Var.1 | 50.4%        | 49.6%        | 100.0%       |
|       |      | % within Var.2 | 21.0%        | 19.1%        | 20.0%        |
|       | 3.00 | Count          | 657054022    | 367404722    | 1024458744   |
|       |      | Expected Count | 490774556.4  | 533684187.6  | 1024458744.0 |
|       |      | % within Var.1 | 64.1%        | 35.9%        | 100.0%       |
|       |      | % within Var.2 | 26.8%        | 13.8%        | 20.0%        |
|       | 4.00 | Count          | 377665846    | 646792898    | 1024458744   |
|       |      | Expected Count | 490774556.4  | 533684187.6  | 1024458744.0 |
|       |      | % within Var.1 | 36.9%        | 63.1%        | 100.0%       |
|       |      | % within Var.2 | 15.4%        | 24.2%        | 20.0%        |
| Total |      | Count          | 2453872782   | 2668420938   | 5122293720   |
|       |      | Expected Count | 2453872782.0 | 2668420938.0 | 5122293720.0 |
|       |      | % within Var.1 | 47.9%        | 52.1%        | 100.0%       |
|       |      | % within Var.2 | 100.0%       | 100.0%       | 100.0%       |

## Reference

1. Coronacases.org, "Coronavirus Cases," [Online]. Available: <https://coronacases.org/>.
2. Radiopaedia, "COVID-19 Pneumonia," [Online]. Available: <https://radiopaedia.org/playlists/25887>.
3. Performance Assessment. In Statistical Pattern Recognition; 2011; pp. 404-432.
